# Supplementary material for: Electrospun Scaffolds Containing Silver-Doped Hydroxyapatite with Antimicrobial Properties for Applications in Orthopedic and Dental Bone Surgery
Source: MDPI journal article supplement (doi:10.3390/jfb11030058), 2020-08-14
Supplement: s1 [file s1]

## Supplementary Materials

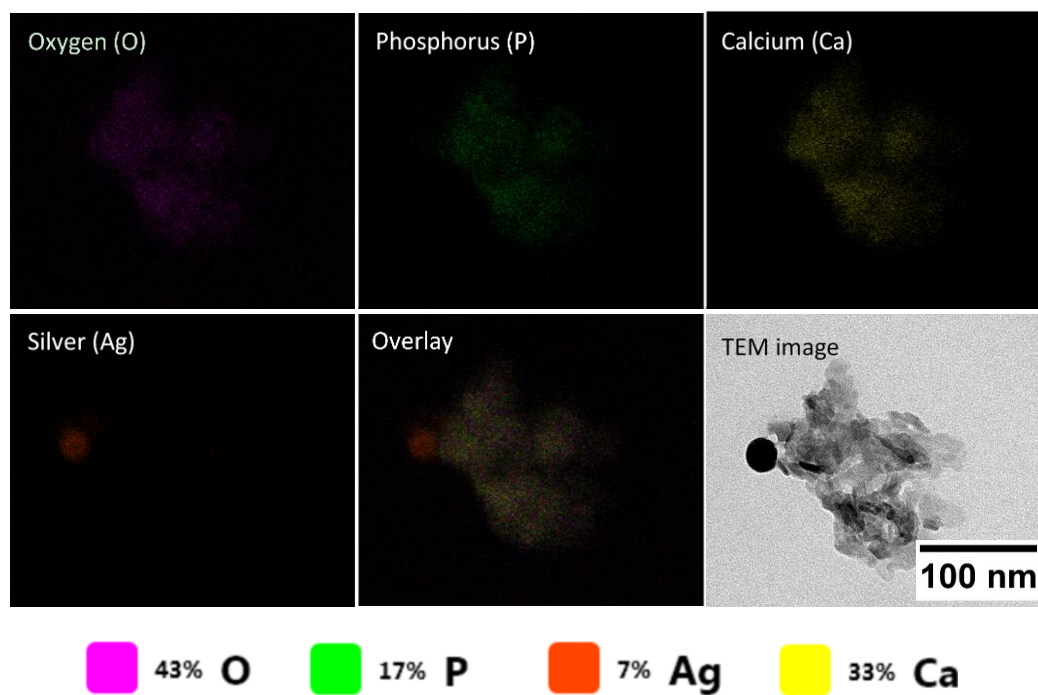

**Figure S1.** EDX elemental mapping of 10 Ag mol.% samples detecting oxygen, phosphorus, calcium and silver. TEM image of the analysed material is also shown for comparison along with an overlay image of all elements in a single frame.
